# Supplementary material for: Time-Varying Clearance in Milrinone Pharmacokinetics from Premature Neonates to Adolescents
Source: Springer Nature journal article supplement (doi:10.1007/s40262-024-01372-5), 2024-04-13
Supplement: MOESM1 [file 26976122]

## Supplementary Information

### *Clinical Pharmacokinetics*

# Time-varying clearance in milrinone pharmacokinetics from premature neonates to adolescents

Conor J O'Hanlon<sup>1</sup>, Anita Sumpter<sup>2</sup>, Brian J Anderson<sup>2,3</sup>, Jacqueline A Hannam<sup>1</sup>

1. Department of Pharmacology & Clinical Pharmacology, University of Auckland, Auckland, New Zealand
2. Department of Anaesthesia, Auckland Hospital, Auckland, New Zealand
3. Department of Anaesthesiology, University of Auckland, Auckland, New Zealand

**Correspondence:**

Name: Jacqueline Hannam

Email: [j.hannam@auckland.ac.nz](mailto:j.hannam@auckland.ac.nz)

## Study demographics

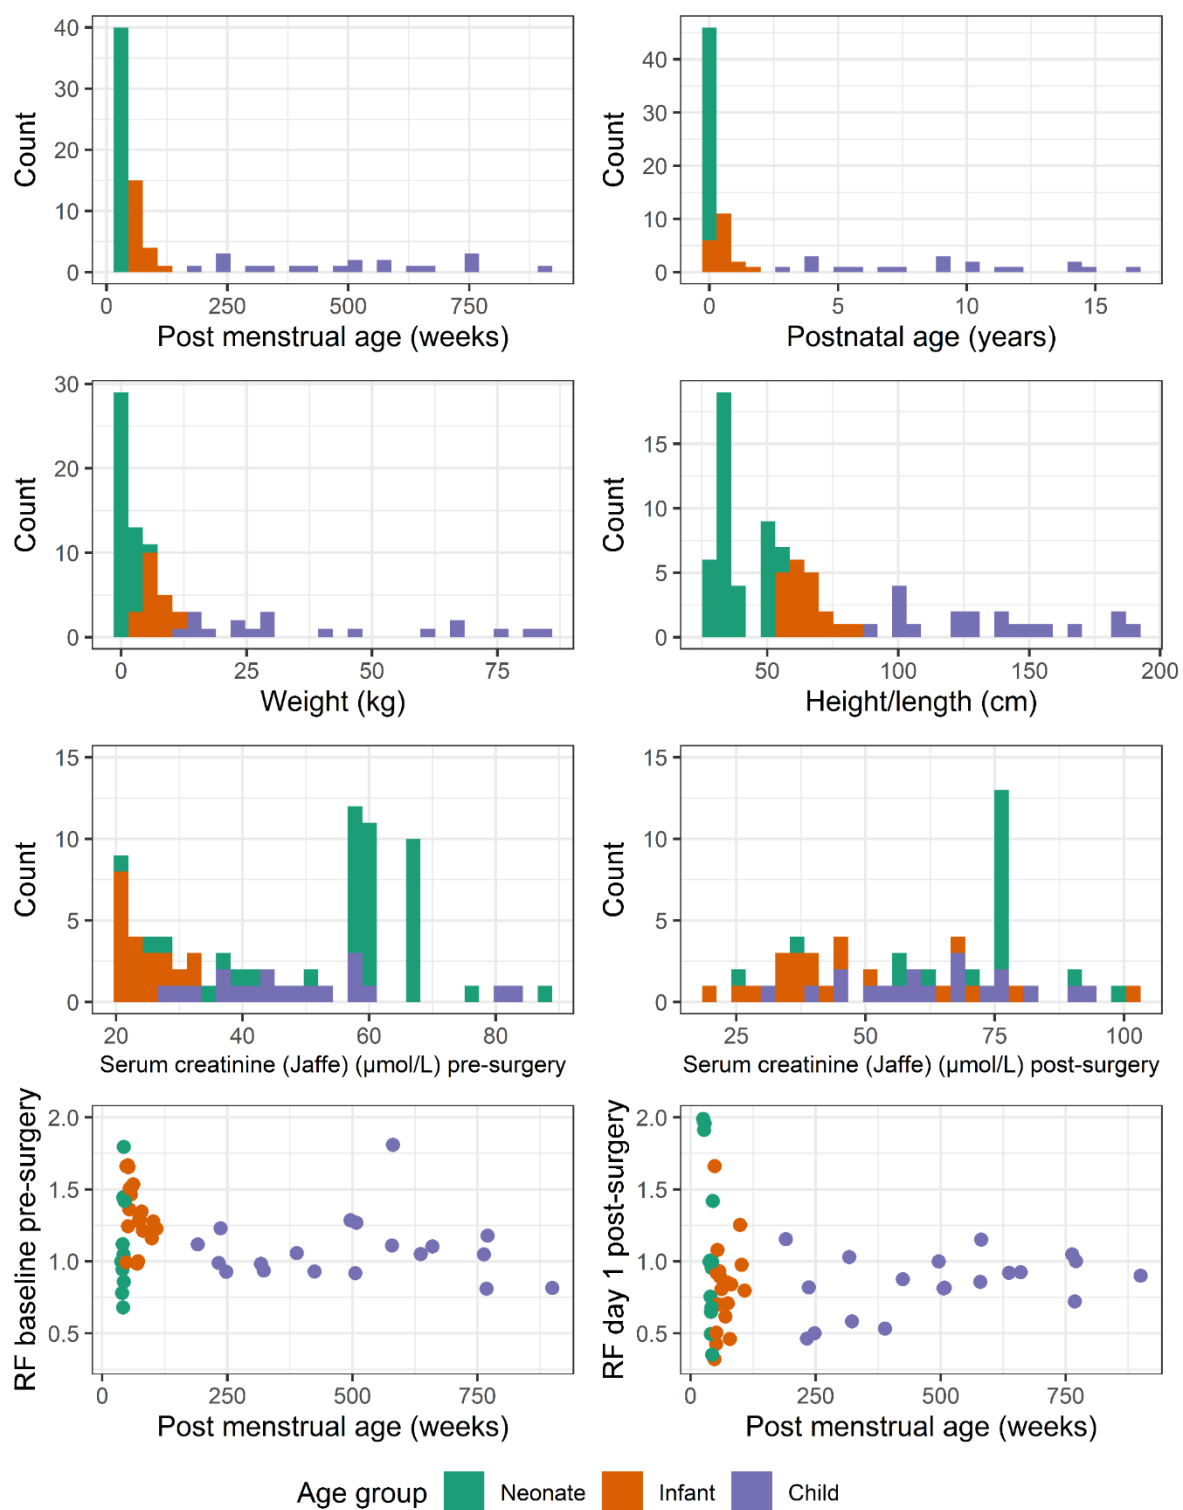

## Visual predictive checks

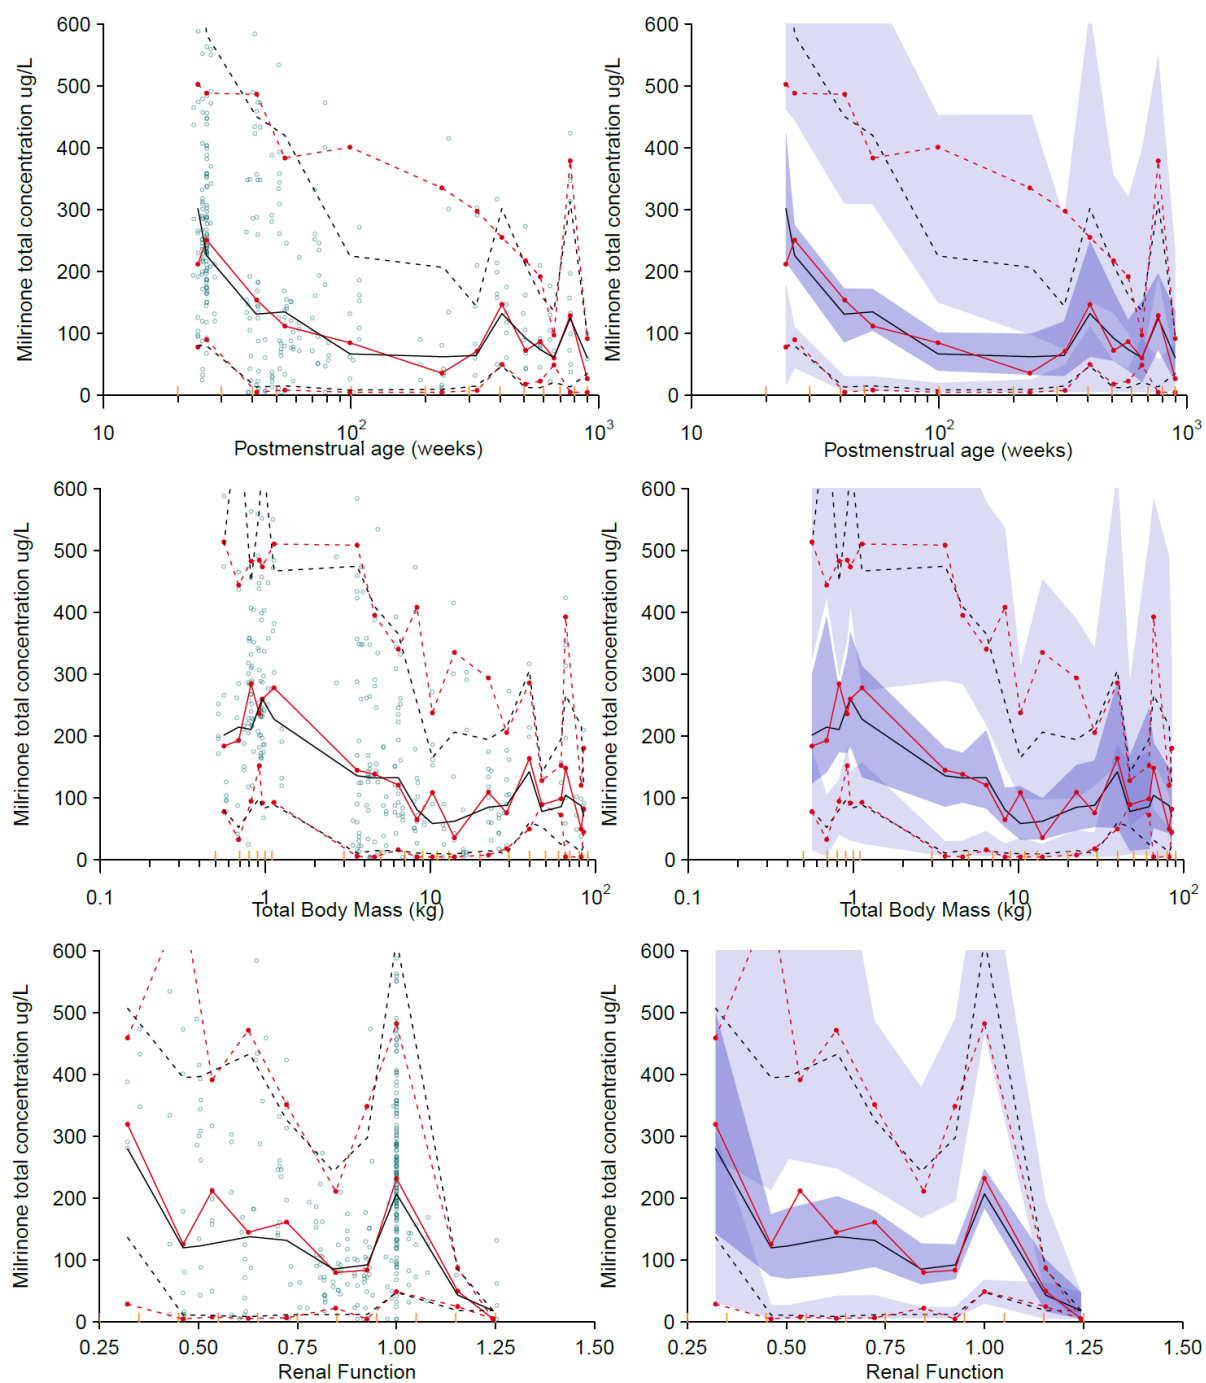

Figure S2 – Visual predictive check for the milrinone pharmacokinetic model with PMA (top), TBM (middle) or RF (bottom) as the independent variable. The 5%, median and 95% percentiles of the distribution of the observations are red and predictions are black. The hollow circles in the left-side plot are the individual observations. The 95% confidence intervals for the prediction percentiles are shown by the purple shaded areas in the right-side plot. The yellow lines on the x-axis show the mid-point of data bins used in the construction of the VPC.

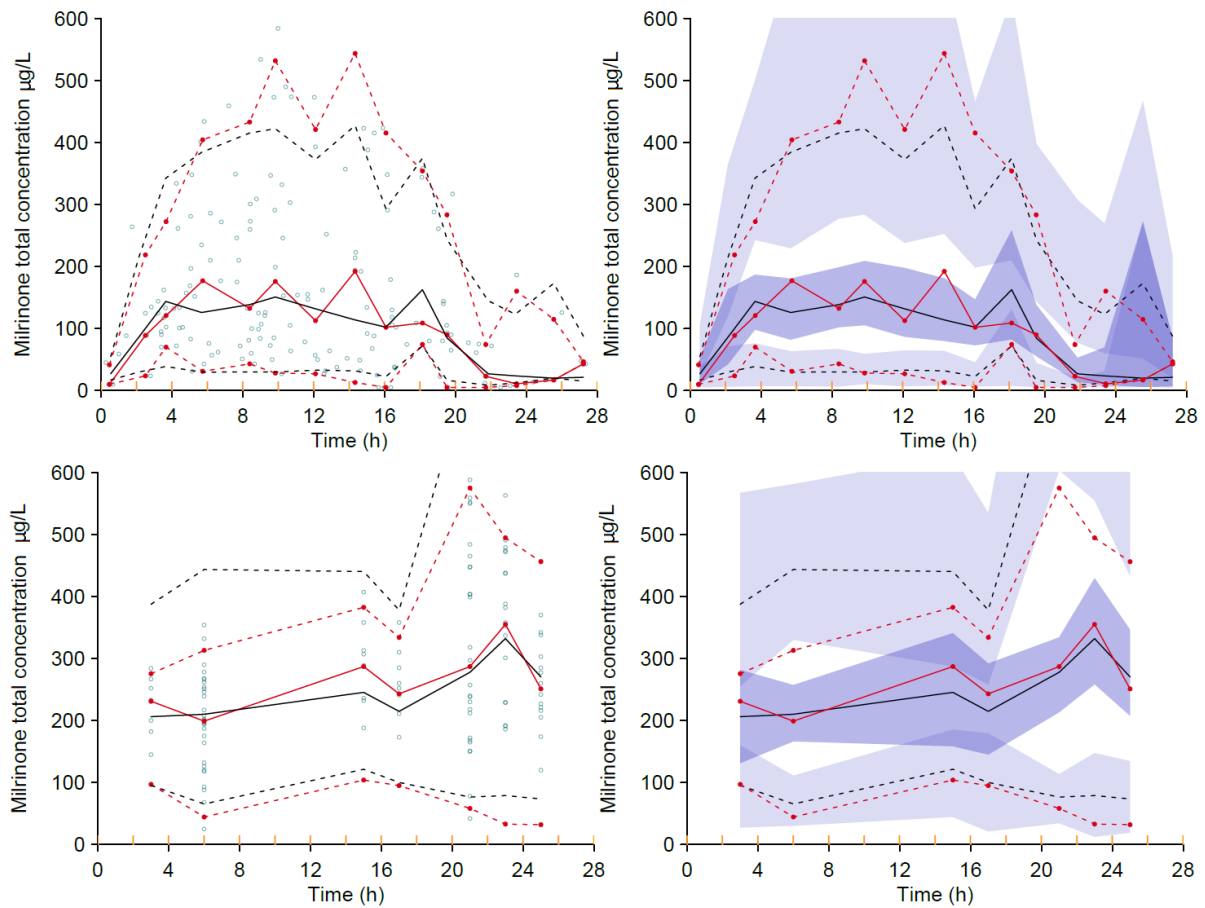

Figure S3 – Visual predictive check for the milrinone pharmacokinetic model separated by study - Starship Hospital clinical study (top) and Paradisis, Jiang [1] study (bottom). The 5%, median and 95% percentiles of the distribution of the observations are red and predictions are black. The hollow circles in the left-side plot are the individual observations. The 95% confidence intervals for the prediction percentiles are shown by the purple shaded areas in the right-side plot. The yellow lines on the x-axis show the mid-point of data bins used in the construction of the VPC.

## Simulations

Table S1 – Proposed milrinone dosing regimen by indication and postnatal age, from Vogt [3].

| Age group                            | LCOS prophylaxis                 |                                         | LCOS treatment                   |                                         |
|--------------------------------------|----------------------------------|-----------------------------------------|----------------------------------|-----------------------------------------|
|                                      | Loading dose<br>(µg/kg over 1 h) | Maintenance<br>dose rate<br>(µg/kg/min) | Loading dose<br>(µg/kg over 1 h) | Maintenance<br>dose rate<br>(µg/kg/min) |
| <b>0 PNA days</b>                    | 75                               | 0.4                                     | 75                               | 0.25                                    |
| <b>&gt;0 days to &lt;1<br/>month</b> | 75                               | 0.5                                     | 75                               | 0.375                                   |
| <b>1 month to &lt;6<br/>months</b>   | 82.5                             | 0.625                                   | 82.5                             | 0.5                                     |
| <b>6 months to &lt;1<br/>year</b>    | 82.5                             | 0.75                                    | 82.5                             | 0.625                                   |
| <b>1 year to &lt;9<br/>years</b>     | 100                              | 1.0                                     | 100                              | 0.75                                    |
| <b>9 years to &lt;15<br/>years</b>   | 82.5                             | 0.75                                    | 82.5                             | 0.625                                   |
| <b>&gt;15 years</b>                  | 82.5                             | 0.7                                     | 75                               | 0.375                                   |

LCOS low cardiac output syndrome, PNA postnatal age.

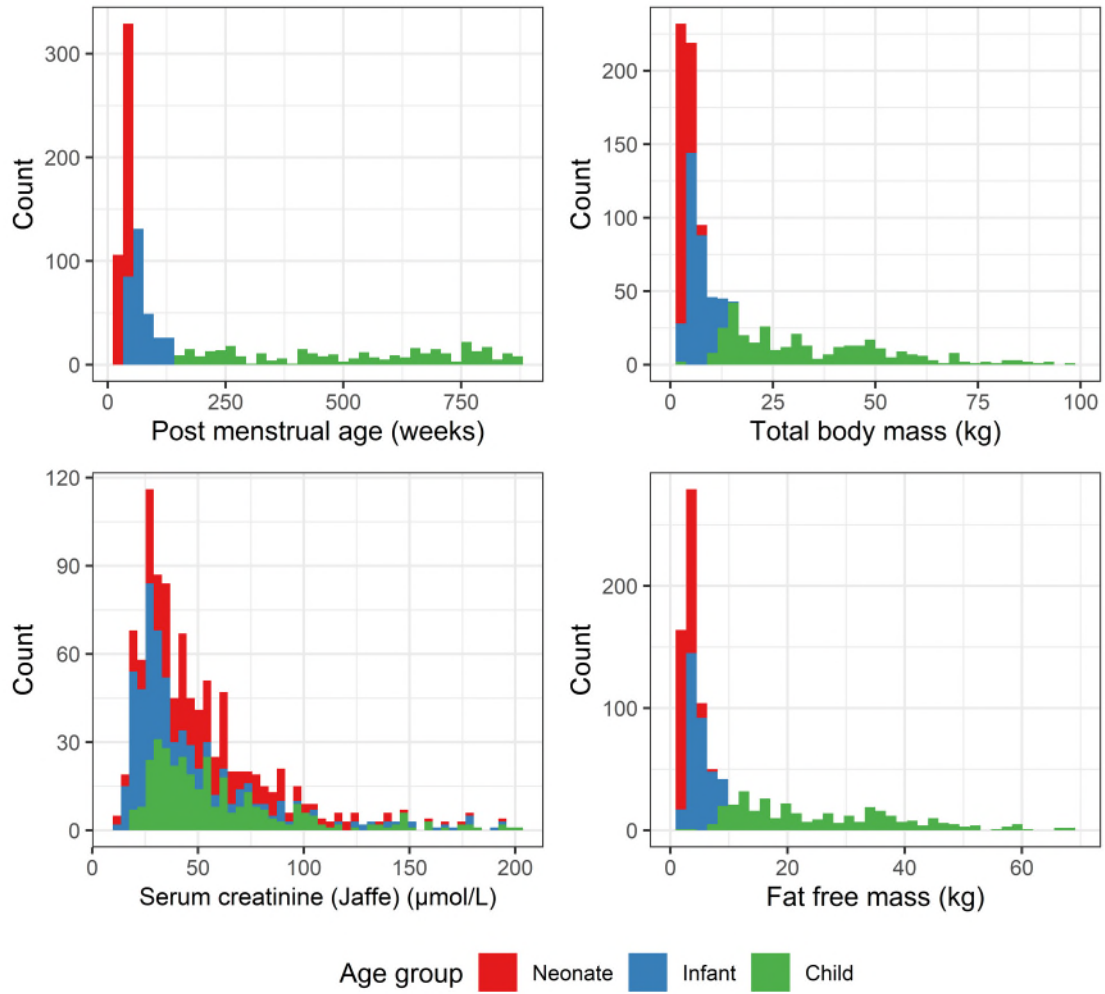

Figure S4 – Histograms showing covariate distributions for 1000 subjects sampled from Holford [4], used in the milrinone simulations. Neonates < 44 weeks PMA, infants < 2 years PNA, children < 16 years PNA.

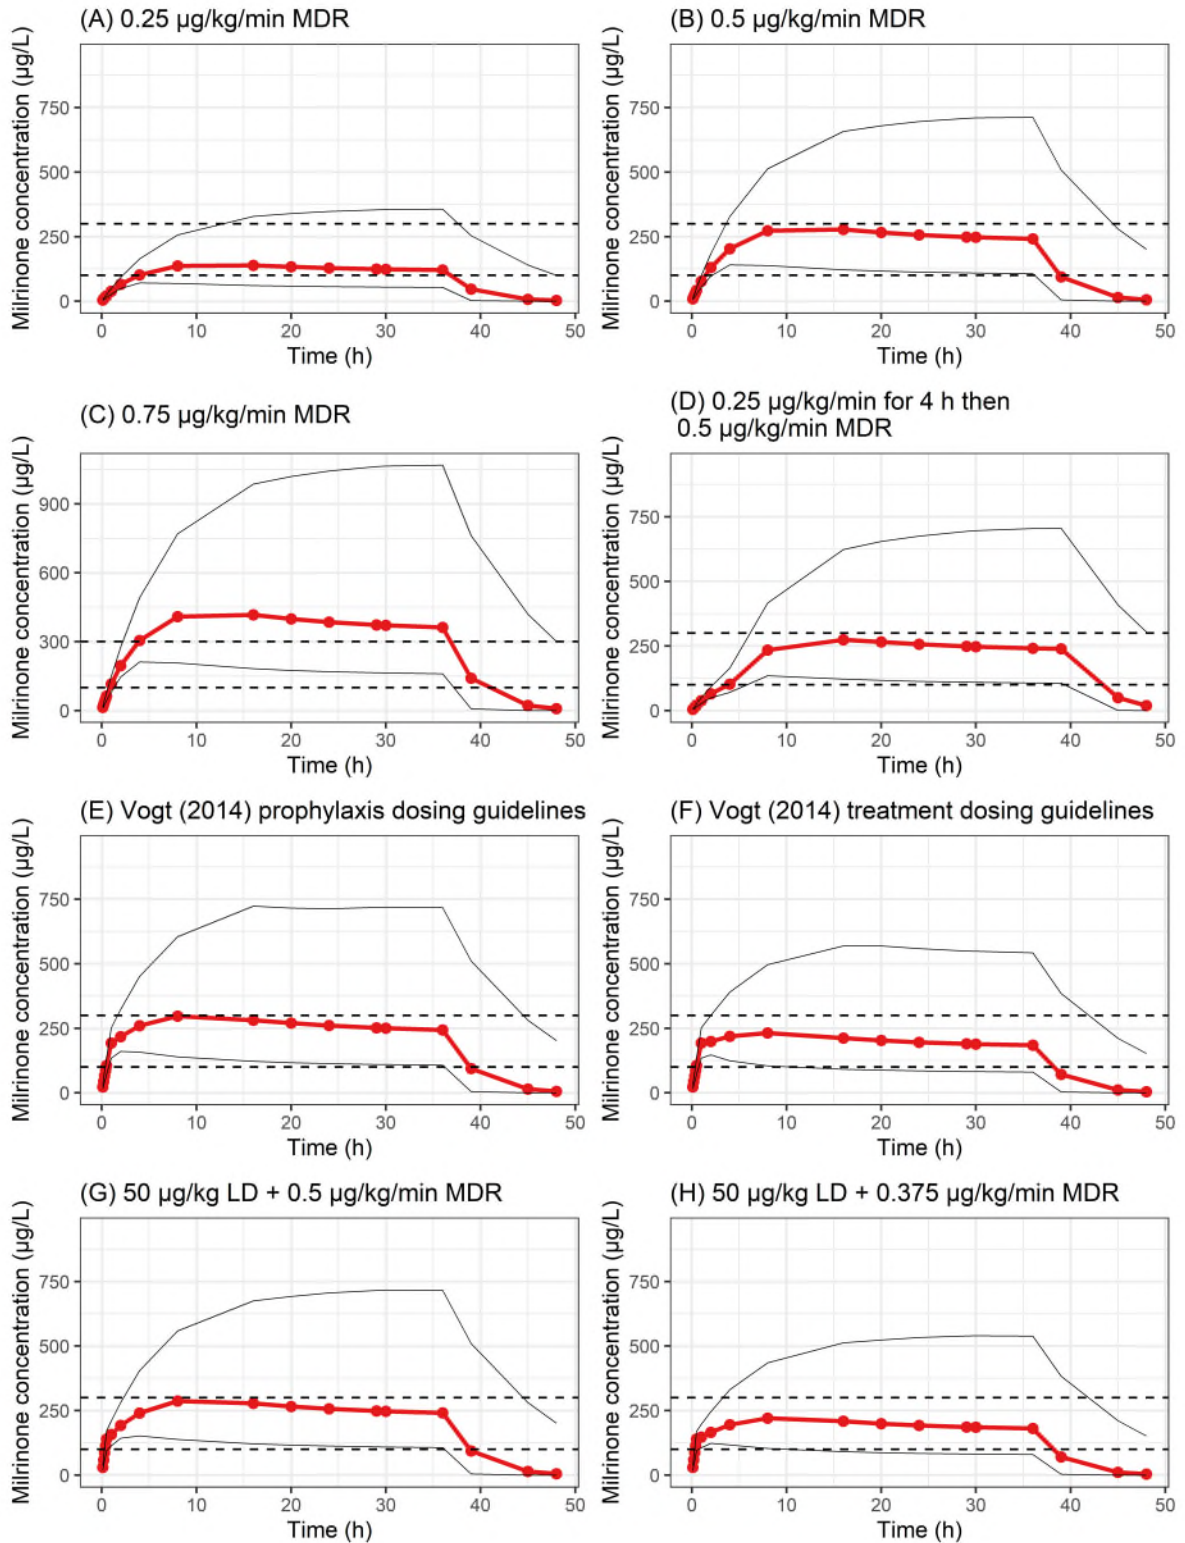

Figure S5 – Simulation studies for **neonates** only (from Figure 3) using the final PK models described in this work and dosing regimens presented in Supplementary Table S1. Subject covariate distributions presented in Supplementary Figure S4. The red lines are the median predictions, the coloured dots are the simulated time points and the outer thin black lines form the 95th prediction percentiles. The dashed lines indicate the acceptable concentration range (100 – 300 µg/L). MDR – maintenance dose rate, LD – loading dose.

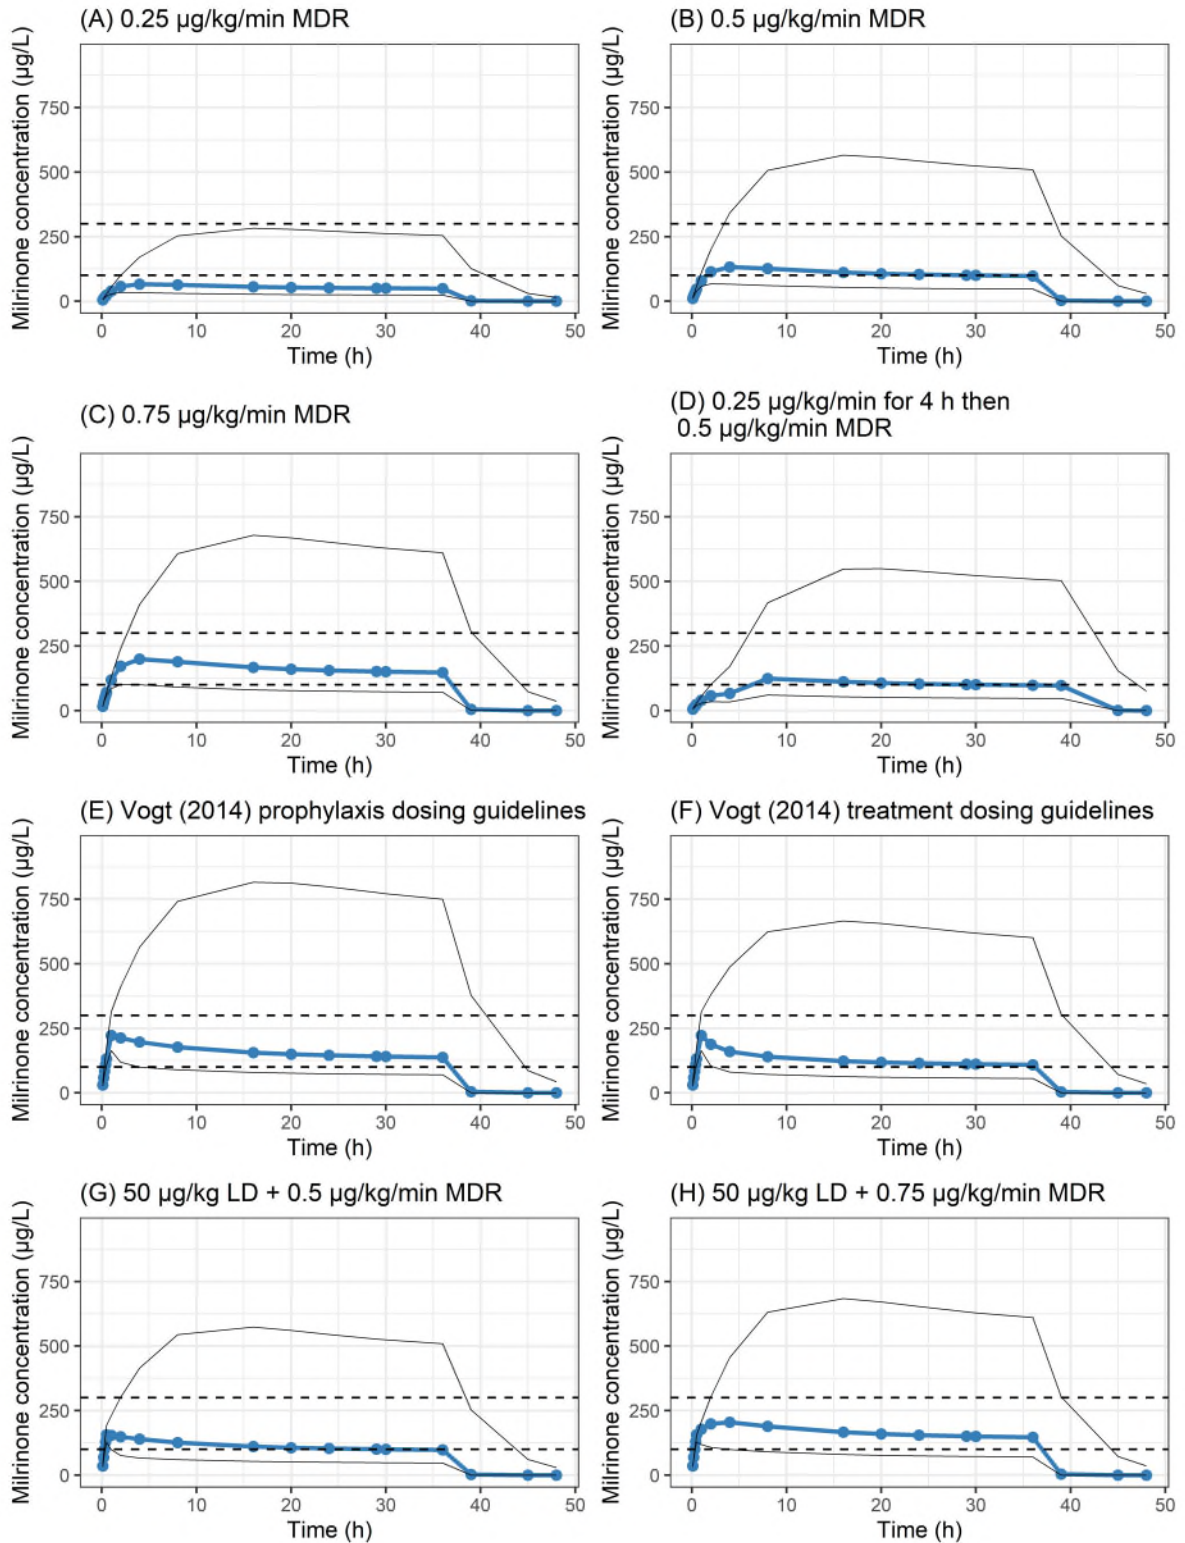

Figure S6 – Simulation studies for **infants** only (from Figure 3) using the final PK models described in this work and dosing regimens presented in Supplementary Table S1. Subject covariate distributions presented in Supplementary Figure S4. The blue lines are the median predictions, the coloured dots are the simulated time points and the outer thin black lines form the 95th prediction percentiles. The dashed lines indicate the acceptable concentration range (100 – 300 µg/L). MDR – maintenance dose rate, LD – loading dose.



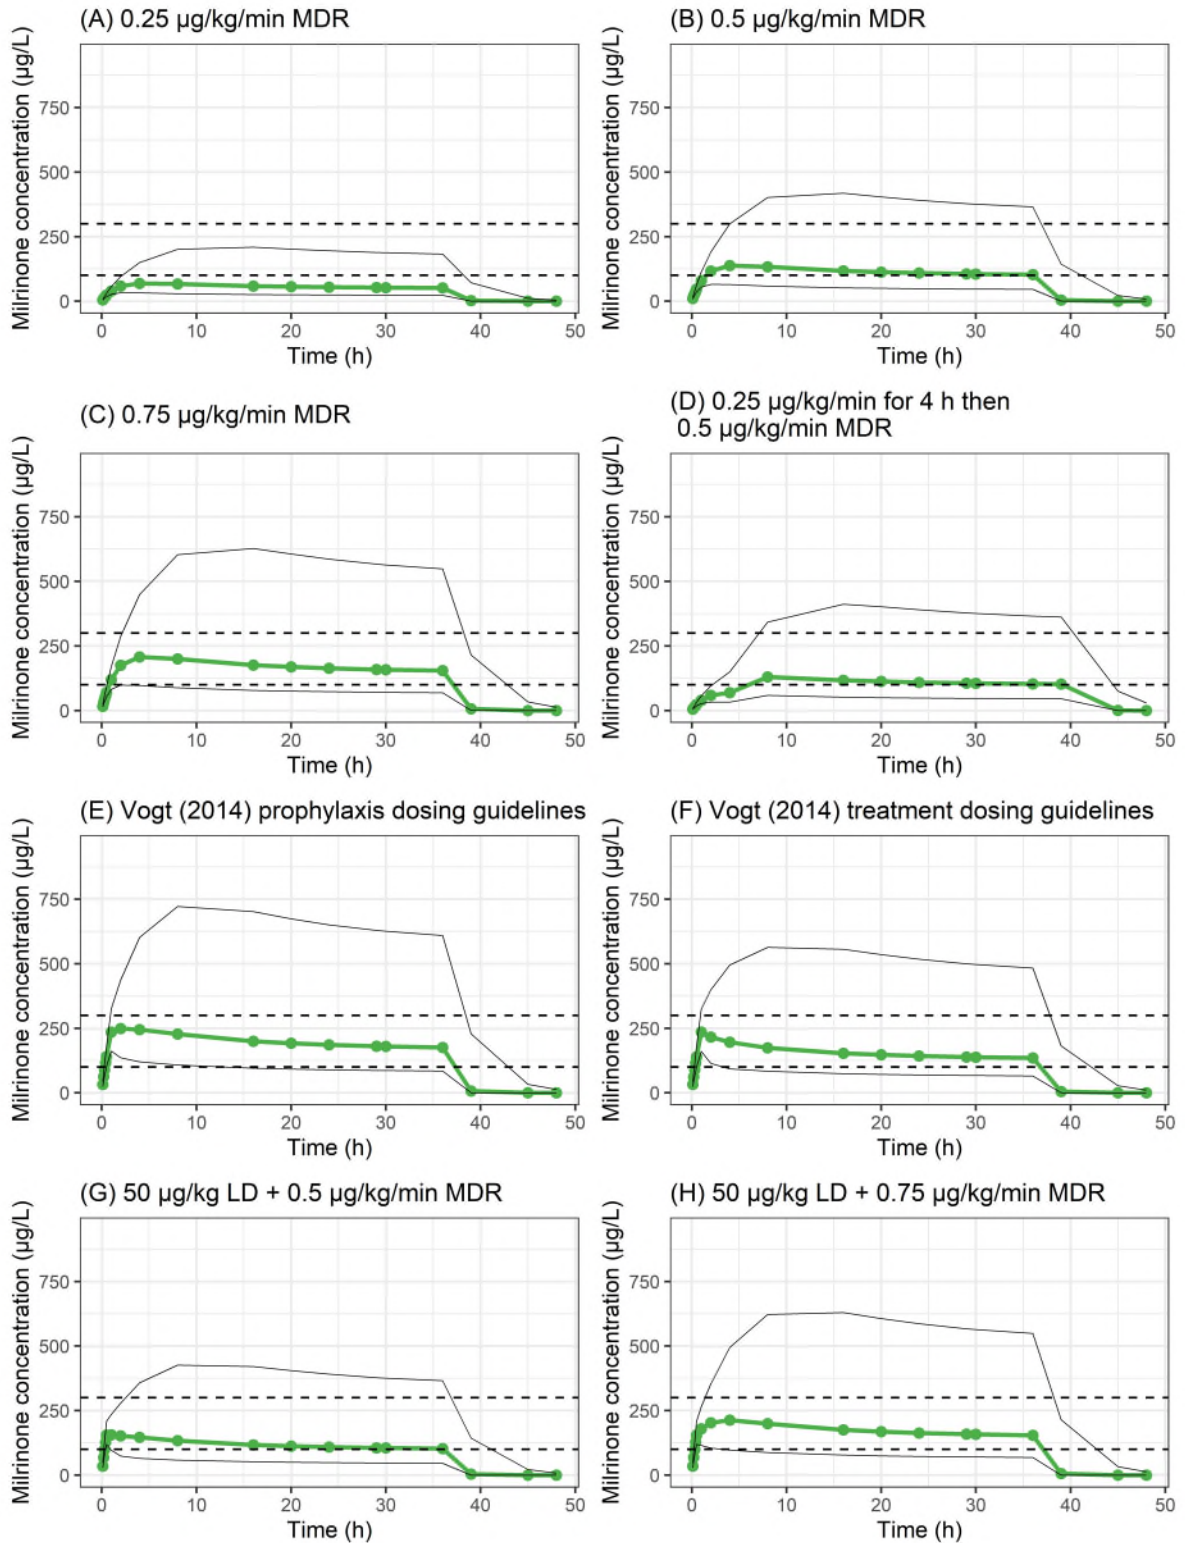

Figure S7 – Simulation studies for **children** only (from Figure 3) using the final PK models described in this work and dosing regimens presented in Supplementary Table S1. Subject covariate distributions presented in Supplementary Figure S4. The green lines are the median predictions, the coloured dots are the simulated time points and the outer thin black lines form the 95th prediction percentiles. The dashed lines indicate the acceptable concentration range (100 – 300 µg/L). MDR – maintenance dose rate, LD – loading dose.

Table S2 – Summary of model selection. Delta parameters and delta OFV is the difference between the model and the reference model. The p-value for the difference between the model and reference model is calculated using the chi-square test, and presented in parentheses.

| Model | Description                                                                                                                           | OFV      | Reference model | Δ parameters | Δ OFV (p-value)      |
|-------|---------------------------------------------------------------------------------------------------------------------------------------|----------|-----------------|--------------|----------------------|
| 1     | One-compartment, maturation parameter estimated                                                                                       | 3105.194 | .               | .            | .                    |
| 2     | Two-compartment, maturation parameters estimated                                                                                      | 3096.537 | 1               | +4           | -8.657 (p > 0.05)    |
| 3     | Three-compartment, maturation parameters estimated                                                                                    | 3098.208 | 1               | +8           | -6.986 (p > 0.05)    |
| 4     | Include RF as a covariate, <i>Ffat</i> parameters estimated                                                                           | 3068.013 | 1               | +2           | -37.181 (p < 0.0001) |
| 5     | Include RF as a covariate, single set of maturation parameters, <i>Ffat</i> parameters fixed to 0 (equivalent to scaling size by FFM) | 3064.796 | 1               | 0            | -40.398 (p < 0.0001) |
| 6     | Include RF as a covariate, single set of maturation parameters, <i>Ffat</i> parameters fixed to 1 (equivalent to scaling size by TBM) | 3075.748 | 1               | 0            | -29.446 (p < 0.0001) |
| 7     | Covariance between CL and V                                                                                                           | 3055.129 | 5               | +1           | -9.667 (p < 0.01)    |
| 8     | Time varying CL                                                                                                                       | 3032.307 | 7               | +2           | -22.822 (p < 0.0001) |
| 9     | PMA maturation of V                                                                                                                   | 3041.32  | 7               | +2           | -13.809 (p < 0.001)  |
| 10    | PNA maturation of V                                                                                                                   | 3031.589 | 7               | +2           | -23.540 (p < 0.001)  |
| 11    | Time varying CL and PMA maturation of V                                                                                               | 3026.312 | 7               | +4           | -28.817 (p < 0.0001) |
| 12    | Time varying CL and PNA maturation of V                                                                                               | 3010.603 | 7               | +4           | -44.526 (p < 0.0001) |
| 13    | Time varying CL and PNA + PMA maturation of V                                                                                         | 3018.838 | 7               | +6           | -36.291 (p < 0.0001) |

CL clearance, *FFM* fat free mass, *OFV* objective function value, *PMA* postmenstrual age, *PNA* postnatal age, *RF* renal function, *TBM* total body mass, *V* volume of distribution.

## Milrinone observations

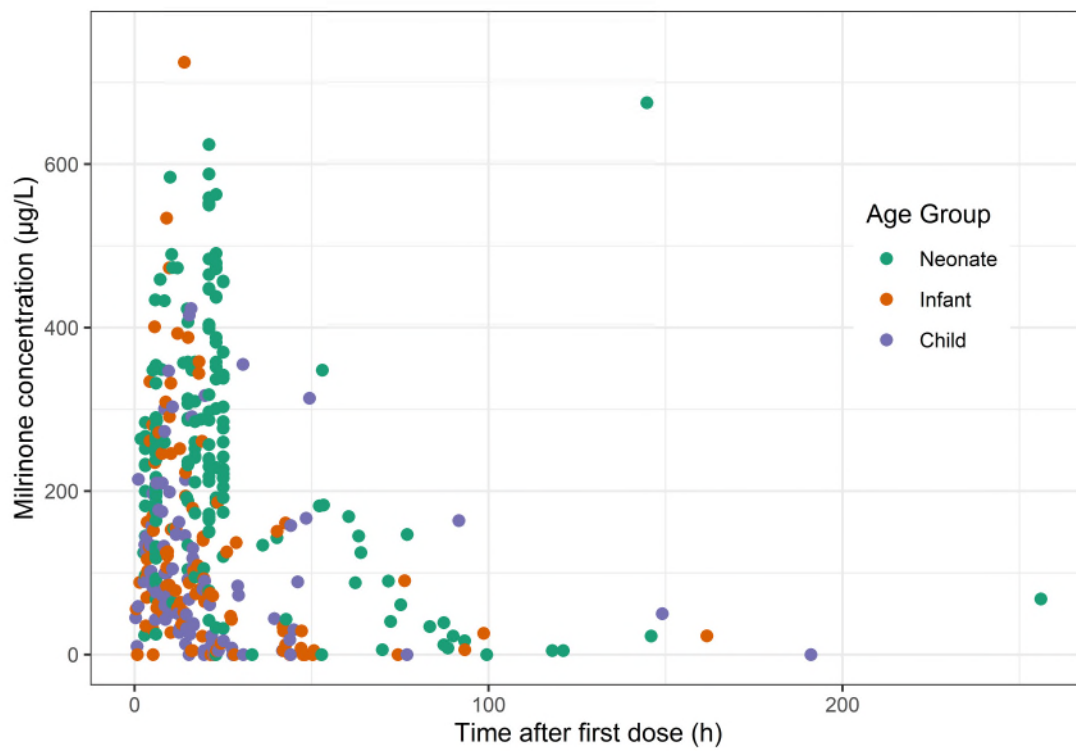

Figure S8 – Milrinone concentration observations stratified by age-group.

## Goodness of fit plots

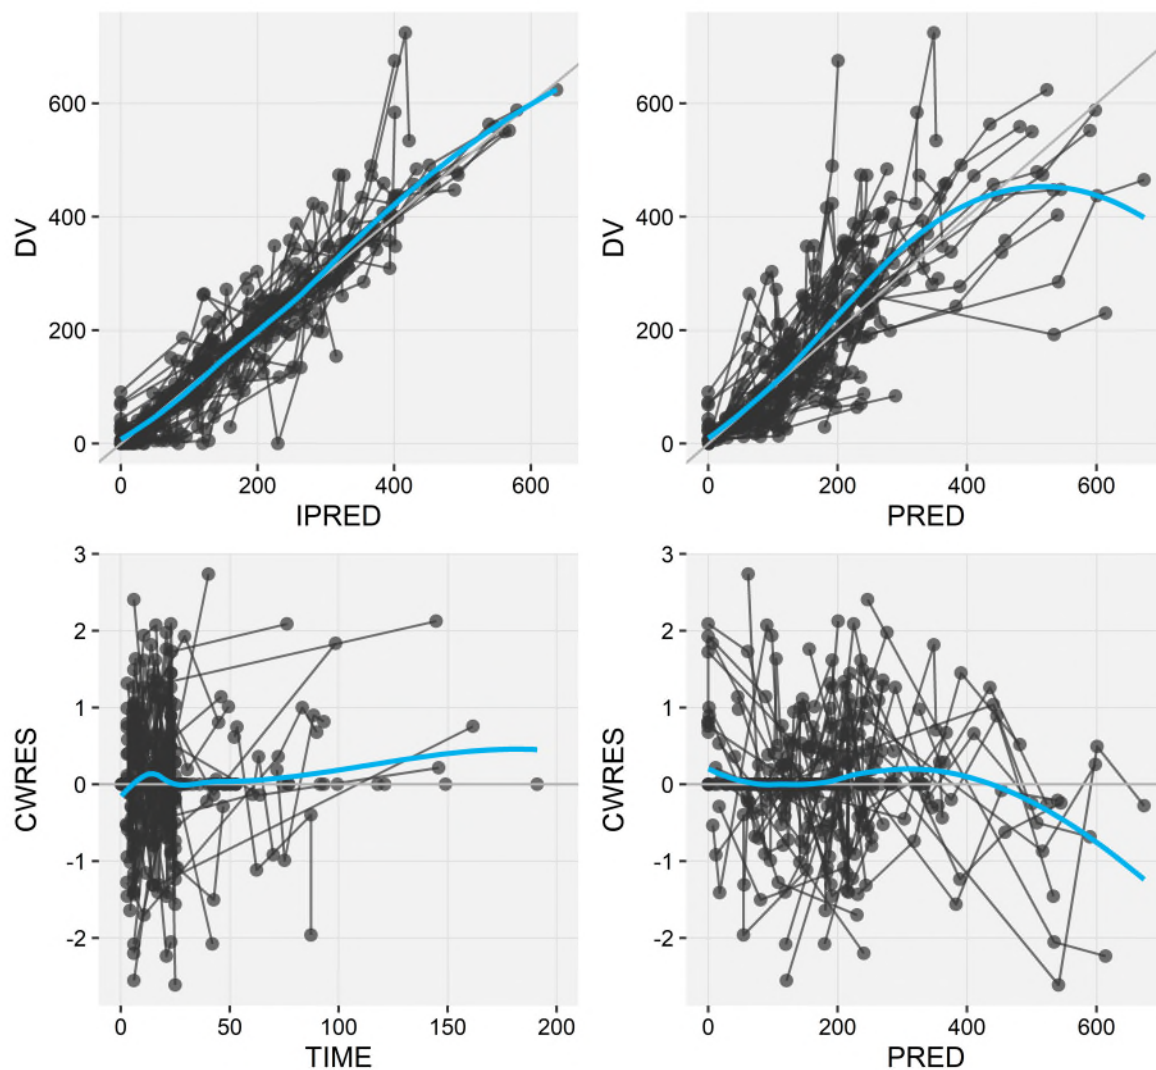

Figure S9 – Goodness of fit plot for the final model.

## References

1. Paradisi M, Jiang X, McLachlan AJ, Evans N, Kluckow M, Osborn D. Population pharmacokinetics and dosing regimen design of milrinone in preterm infants. *Archives of Disease in Childhood - Fetal and Neonatal Edition*. 2007;92(3):F204-F9.
2. O’Hanlon CJ, Holford N, Sumpter A, Al-Sallami HS. Consistent Methods for Fat Free Mass, Creatinine Clearance and Glomerular Filtration Rate to describe Renal Function from Neonates to Adults. *CPT: Pharmacometrics and Systems Pharmacology*. 2023;12(3):401-12.
3. Vogt W. Evaluation and optimisation of current milrinone prescribing for the treatment and prevention of low cardiac output syndrome in paediatric patients after open heart surgery using a physiology-based pharmacokinetic drug–disease model. *Clinical pharmacokinetics*. 2014;53(1):51-72.
4. Holford NH, editor *Systems Pharmacology – Learning from GAVamycin*. PAGANZ; 2017 8 February; Adelaide [<https://www.paganz.org/abstracts/systems-pharmacology-application-to-gavamycin/>].
